# Supplementary material
Source: publisher site journal article supplement (https://www.degruyterbrill.com/publication/journal_key/PRBS/downloadAsset/PRBS_Template%20for%20Ethical%20and%20Legal%20Declarations.docx)
Supplement: Supplementary file 2 [file PRBS_Template%20for%20Ethical%20and%20Legal%20Declarations.docx]

Please fill in the information requested below and follow the format and order as indicated in the [template]. Follow the [instructions] on page 2*.* The statements will be inserted between the main text and the reference list in the final typeset article.

Make sure that (any) author statements on ethical and legal matters in the main text of the manuscript text match those in the [TEMPLATE]. In case of different information, only the information given in the [template] will be used in the final typeset article.

[TEMPLATE]

We do not accept submissions that name Large Language Models (LLM), such as ChatGPT, Artificial Intelligence (AI) and Machine Learning Tools (MLT) as credited author(s) on a manuscript because such tools cannot take responsibility for the submitted work and therefore cannot be considered as eligible authors. Use of an LLM, AI or MLT should be properly documented in the manuscript and must be stated in this template.

| ***STATEMENT*** | ***TEXT*** |
| --- | --- |
| **Acknowledgments** |  |
| **Research ethics** |  |
| **Informed consent** |  |
| **Author contributions (for double- anonymized journals: please use initials)** |  |
| **Use of Large Language Models, AI and Machine Learning Tools** |  |
| **Conflict of interest** |  |
| **Research funding** |  |
| **Data availability** |  |
|  |  |
|  |  |

[INSTRUCTIONS]

[MANDATORY STATEMENTS]

**Acknowledgments** Enter the appropriate information. If not applicable, please remove from the template.

**Research ethics** If IRB approval is required

- Provide the information applicable to your study, including the date ethical approval was granted and the document ID. Authors publishing in medical journals should indicate that their study was conducted in accordance with the Declaration of Helsinki (as revised in 2013).

If the IRB specifically exempted the study from review **OR**
If not required, please insert

- The local Institutional Review Board deemed the study exempt from review. **OR**
- Not applicable.

**Informed consent** If required, please insert

- Informed consent was obtained from all individuals included in this study, or their legal guardians or wards.

If not required, please insert

- Not applicable.

**Author contributions** Insert the mandatory default statement below and include more detailed information about an individual author’s contribution, if applicable. Authors contributing to double-anonymized journals should use their initials.

- All authors have accepted responsibility for the entire content of this manuscript and approved its submission. **OR in the case of a single author contribution**
- The author has accepted responsibility for the entire content of this manuscript and approved its submission.

**Use of LLM, AI and** Where such tools are used as part of the design of a manuscript, please specify

**MLT** the tool and the purpose of its use (for example to improve language, or

combine or enhance existing figures).

If you did not use LLM, AI or MLT, please insert

- None declared.

**Conflict of interest** State if any author(s) has/have a conflict of interest, including the name of the author(s) and the reason, and, if applicable, add

- All other authors state no conflict of interest.

If none of the authors has a conflict of interest, please insert

- The authors state no conflict of interest.

**OR in the case of a single author contribution**

- The author states no conflict of interest.

**Research funding** Stateif your study was financially supported (add funding agency and grant number).

If not required, please insert

- None declared.

**Data availability** Please refer to our [Data Sharing Policy](https://www.degruyter.com/publishing/services/rights-and-permissions/our-data-sharing-policy?lang=en) for guidance on how to write a data availability statement.

If the type of study does not include raw data, please insert

- Not applicable.

[OPTIONAL STATEMENTS]

In addition to the mandatory information, you can provide information on the aspects below by adding the statement(s) to the template. Make sure you follow the order and terminology given in the template.

**| Consultant or advisory role | Role of sponsor | Employment or leadership | Honorarium | Patents | Other remuneration |Software availability| Clinical trial registration |**
